# Supplementary material
Source: PubMed Central journal article supplement (PMC4788136)
Supplement: Supp_Table3.pdf [file Supp_Table3.pdf]

**Supplementary Table S3. Vector DNA shedding in urine**

| Group | Animal number | Study day | Copies per sample | Mass per sample ( $\mu\text{g}$ ) | Copies per $\mu\text{g}$ |
|-------|---------------|-----------|-------------------|-----------------------------------|--------------------------|
| 1     | I03225        | 3         | –                 | 0.000                             | NA                       |
| 1     | I03225        | 8         | –                 | 0.000                             | NA                       |
| 1     | I03226        | 3         | <i>14</i>         | 0.012                             | 1,113                    |
| 1     | I03226        | 8         | –                 | 0.003                             | –                        |
| 1     | I03227        | 3         | <i>13</i>         | 0.005                             | 2,537                    |
| 1     | I03227        | 8         | –                 | 0.010                             | –                        |
| 1     | I03228        | 3         | –                 | 0.013                             | –                        |
| 1     | I03228        | 8         | –                 | 0.008                             | –                        |
| 1     | I03229        | 3         | –                 | 0.004                             | –                        |
| 1     | I03229        | 8         | –                 | 0.000                             | NA                       |
| 1     | I03230        | 3         | –                 | 0.025                             | –                        |
| 1     | I03230        | 8         | –                 | 0.000                             | –                        |
| 2     | I03231        | 3         | –                 | 0.000                             | NA                       |
| 2     | I03231        | 8         | –                 | 0.000                             | NA                       |
| 2     | I03233        | 3         | –                 | 0.000                             | NA                       |
| 2     | I03233        | 8         | –                 | 0.000                             | NA                       |
| 2     | I03234        | 3         | –                 | 0.000                             | NA                       |
| 2     | I03234        | 8         | –                 | 0.000                             | NA                       |
| 2     | I03235        | 3         | –                 | 0.000                             | NA                       |
| 2     | I03235        | 8         | –                 | 0.000                             | NA                       |
| 2     | I03236        | 3         | <i>11</i>         | 0.056                             | 196                      |
| 2     | I03236        | 8         | –                 | 0.005                             | –                        |
| 2     | I03243        | 3         | <i>41</i>         | 0.012                             | 3,321                    |
| 2     | I03243        | 8         | –                 | 0.000                             | NA                       |
| 3     | I03237        | 3         | <i>62</i>         | 0.015                             | 4,000                    |
| 3     | I03237        | 8         | –                 | 0.003                             | –                        |
| 3     | I03238        | 3         | <b>519</b>        | 0.017                             | 29,680                   |
| 3     | I03238        | 8         | –                 | 0.007                             | –                        |
| 3     | I03239        | 3         | <b>114</b>        | 0.004                             | 29,524                   |
| 3     | I03239        | 8         | –                 | 0.000                             | NA                       |
| 3     | I03240        | 3         | <b>146</b>        | 0.018                             | 8,331                    |
| 3     | I03240        | 8         | –                 | 0.003                             | –                        |
| 3     | I03241        | 3         | <i>29</i>         | 0.006                             | 4,681                    |
| 3     | I03241        | 8         | –                 | 0.008                             | –                        |
| 3     | I03242        | 3         | <i>28</i>         | 0.005                             | 6,221                    |
| 3     | I03242        | 8         | –                 | 0.017                             | –                        |

NA, not applicable because the mass of DNA extracted was 0.

Dash (–), less than lower limit of quantification. Values of 11–100 copies per sample are highlighted in *italics* and values >100 copies per sample are highlighted in **bold italics**.
